# Supplementary material for: Gastrointestinal microbial community changes in Atlantic cod (Gadus morhua) exposed to crude oil
Source: BMC Microbiol. 2018 Apr 2;18:25. doi: 10.1186/s12866-018-1171-2 (PMC5879832; doi:10.1186/s12866-018-1171-2)
Supplement: Supplementary file 5 — Table S4. Condition indices (CI) and hepatosomatic indices (HSI) of oil exposed Atlantic cod specimens. (XLSX 9 kb) [file 12866_2018_1171_MOESM5_ESM.xlsx]

## Sheet: Physiological parameters
Fish code	Treatment	Weight (g)	Length (cm)	Liver weight (g)	CI	LSI	Gender
37	C	397.2	38	3	52.0406	0.76	Female
38	C	865.1	47	40	91.64	4.62	Female
39	C	325.2	34	27	47.6199	8.3	Male
43	L	516.1	40	4.95	64.2378	0.96	Female
44	L	450.5	37	4.06	60.6191	0.9	Female
45	L	488.4	40	16.52	60.79	3.38	Female
48	M	320.6	35	7.4	45.605	2.31	Male
49	M	724.6	44	3.31	81.9902	0.46	Female
50	M	382.3	36	9.72	52.8711	2.54	Female
57	H	240	30	NA	39.8297	NA	Male
58	H	406.1	37	3.86	54.6447	0.95	Female
59	H	292.6	35	2.27	41.622	0.78	Male
CI - Condition index
HSI - Hepatosomatic index
