# Supplementary material for: Gastrointestinal microbial community changes in Atlantic cod (Gadus morhua) exposed to crude oil
Source: BMC Microbiol. 2018 Apr 2;18:25. doi: 10.1186/s12866-018-1171-2 (PMC5879832; doi:10.1186/s12866-018-1171-2)
Supplement: Supplementary file 9 — Table S8. Library sizes. (XLSX 9 kb) [file 12866_2018_1171_MOESM9_ESM.xlsx]

## Sheet: Library sizes
Sample	File	Direction	Reads
37	37_S2_L001_R1_001.fastq.gz	F	1349934
37	37_S2_L001_R2_001.fastq.gz	R	1349934
38	38_S4_L001_R1_001.fastq.gz	F	1269257
38	38_S4_L001_R2_001.fastq.gz	R	1269257
39	39_S6_L001_R1_001.fastq.gz	F	1502998
39	39_S6_L001_R2_001.fastq.gz	R	1502998
43	43_S8_L001_R1_001.fastq.gz	F	1668157
43	43_S8_L001_R2_001.fastq.gz	R	1668157
44	44_S10_L001_R1_001.fastq.gz	F	1483443
44	44_S10_L001_R2_001.fastq.gz	R	1483443
45	45_S11_L001_R1_001.fastq.gz	F	861838
45	45_S11_L001_R2_001.fastq.gz	R	861838
48	48_S12_L001_R1_001.fastq.gz	F	1010244
48	48_S12_L001_R2_001.fastq.gz	R	1010244
49	49_S1_L001_R1_001.fastq.gz	F	1177600
49	49_S1_L001_R2_001.fastq.gz	R	1177600
50	50_S3_L001_R1_001.fastq.gz	F	1496857
50	50_S3_L001_R2_001.fastq.gz	R	1496857
57	57_S5_L001_R1_001.fastq.gz	F	1408407
57	57_S5_L001_R2_001.fastq.gz	R	1408407
58	58_S7_L001_R1_001.fastq.gz	F	1158652
58	58_S7_L001_R2_001.fastq.gz	R	1158652
59	59_S9_L001_R1_001.fastq.gz	F	1371070
59	59_S9_L001_R2_001.fastq.gz	R	1371070
		Mean:	1.3132e+06
